# Supplementary material
Source: ML conference proceedings conference paper supplement (https://openaccess.thecvf.com/content/CVPR2022/html/Lin_Autofocus_for_Event_CVPR_2022_paper.html)
Supplement: Supplementary file 1 [file Lin_Autofocus_for_Event_CVPR_2022_supplemental.zip]

# Autofocus for Event Cameras -Supplemental Material-

Shijie Lin<sup>1,5</sup>, Yinqiang Zhang<sup>1,5</sup>, Lei Yu<sup>2</sup>, Bin Zhou<sup>3</sup>, Xiaowei Luo<sup>4</sup>, Jia Pan<sup>1</sup>

<sup>1</sup>The University of Hong Kong   <sup>2</sup>Wuhan University   <sup>3</sup>Beihang University   <sup>4</sup>City University of Hong Kong

Project page: [https://eleboss.github.io/eaf\\_webpage/](https://eleboss.github.io/eaf_webpage/)

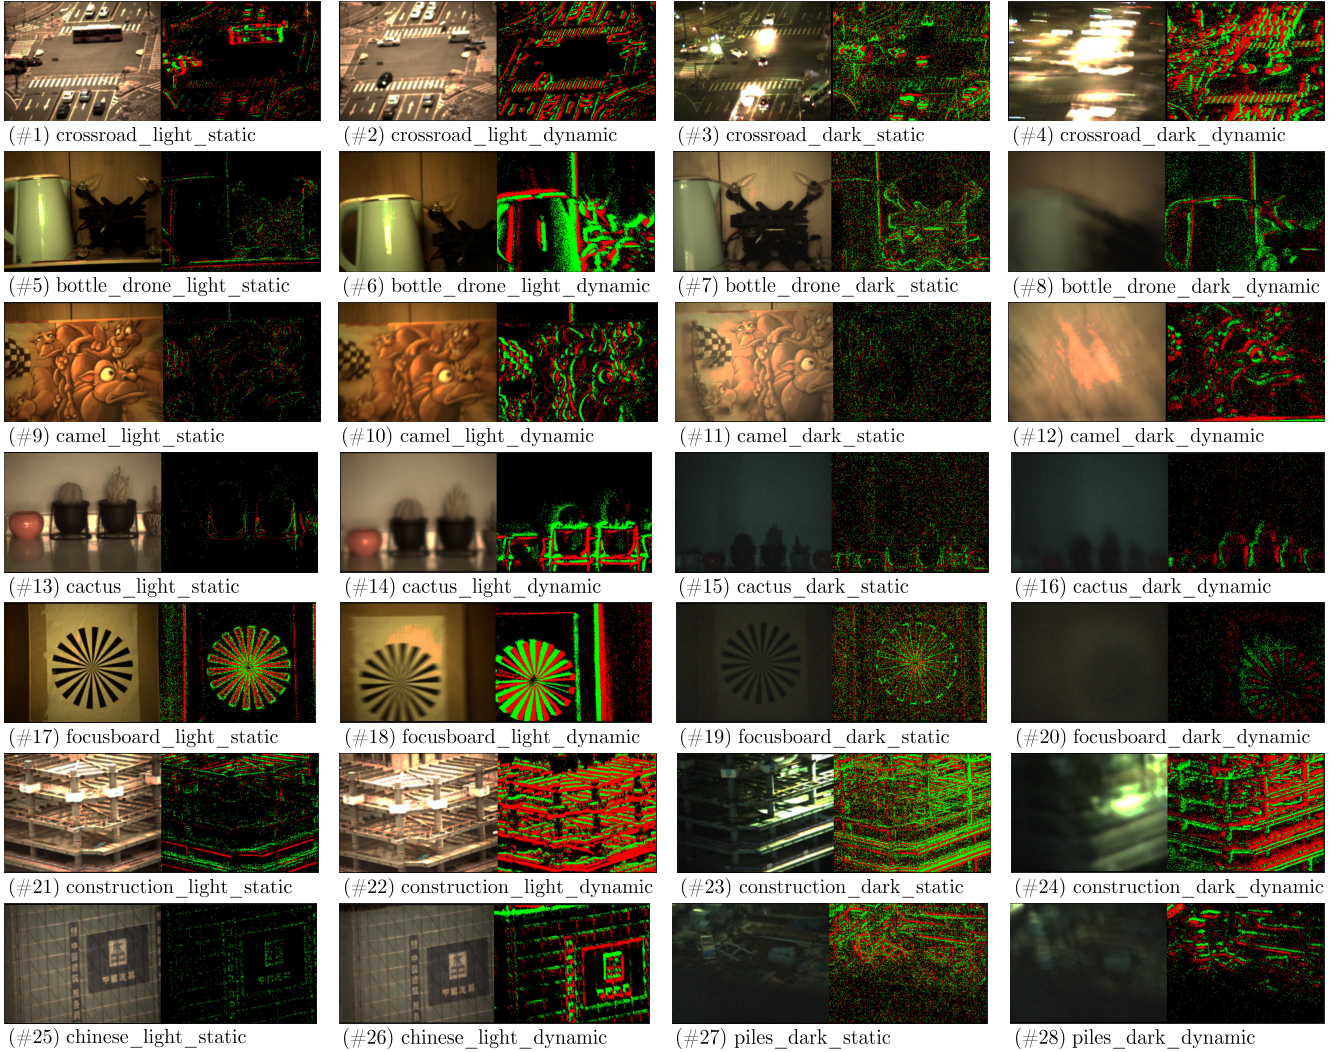

Figure 1. Examples of sequences in the proposed EAD. Images are screenshots of RGB frame (left) and event frame (right) captured at the optimal focal position.

Table 1. Details of the event-based autofocus dataset

| ID | Scene              | Images | Events | Lighting | Luminance  | Indoor/Outdoor | Shaking motion | Name                       |
|----|--------------------|--------|--------|----------|------------|----------------|----------------|----------------------------|
| 1  | Crossroad          | 641    | 412K   | Light    | 14.3K Lux  | Outdoor        |                | crossroad_light_static     |
| 2  | Crossroad          | 1025   | 13039K | Light    | 14.3K Lux  | Outdoor        | ✓              | crossroad_light_dynamic    |
| 3  | Crossroad          | 45     | 3809K  | Dark     | 5.7 Lux    | Outdoor        |                | crossroad_dark_static      |
| 4  | Crossroad          | 77     | 26198K | Dark     | 5.7 Lux    | Outdoor        | ✓              | crossroad_dark_dynamic     |
| 5  | Bottle & Drone     | 346    | 211K   | Light    | 174.3 Lux  | Indoor         |                | bottle_drone_light_static  |
| 6  | Bottle & Drone     | 402    | 11929K | Light    | 142 Lux    | Indoor         | ✓              | bottle_drone_light_dynamic |
| 7  | Bottle & Drone     | 37     | 1493 K | Dark     | 3.25 Lux   | Indoor         |                | bottle_drone_dark_static   |
| 8  | Bottle & Drone     | 59     | 13624K | Dark     | 2.49 Lux   | Indoor         | ✓              | bottle_drone_dark_dynamic  |
| 9  | Camel              | 240    | 84K    | Light    | 168.1 Lux  | Indoor         |                | camel_light_static         |
| 10 | Camel              | 559    | 7220 K | Light    | 168.1 Lux  | Indoor         | ✓              | camel_light_dynamic        |
| 11 | Camel              | 37     | 1186K  | Dark     | 5.5 Lux    | Indoor         |                | camel_dark_static          |
| 12 | Camel              | 54     | 9984K  | Dark     | 5.5 Lux    | Indoor         | ✓              | camel_dark_dynamic         |
| 13 | Cactus             | 755    | 57K    | Light    | 1308 Lux   | Indoor         |                | cactus_light_static        |
| 14 | Cactus             | 1027   | 2942K  | Light    | 1308 Lux   | Indoor         | ✓              | cactus_light_dynamic       |
| 15 | Cactus             | 39     | 1631K  | Dark     | 0.7 Lux    | Indoor         |                | cactus_dark_static         |
| 16 | Cactus             | 71     | 3617K  | Dark     | 0.7 Lux    | Indoor         | ✓              | cactus_dark_dynamic        |
| 17 | Focus board        | 369    | 229K   | Light    | 130 Lux    | Indoor         |                | focusboard_light_static    |
| 18 | Focus board        | 489    | 16149K | Light    | 130 Lux    | Indoor         | ✓              | focusboard_light_dynamic   |
| 19 | Focus board        | 38     | 2365K  | Dark     | 1.3 Lux    | Indoor         |                | focusboard_dark_static     |
| 20 | Focus board        | 29     | 3194K  | Dark     | 1.3 Lux    | Indoor         | ✓              | focusboard_dark_dynamic    |
| 21 | Construction sites | 548    | 100K   | Light    | 11.46K Lux | Outdoor        |                | construction_light_static  |
| 22 | Construction sites | 805    | 10595K | Light    | 11.46K Lux | Outdoor        | ✓              | construction_light_dynamic |
| 23 | Construction sites | 52     | 1986K  | Dark     | 4.3 Lux    | Outdoor        |                | construction_dark_static   |
| 24 | Construction sites | 69     | 20020K | Dark     | 4.3 Lux    | Outdoor        | ✓              | construction_dark_dynamic  |
| 25 | Chinese characters | 730    | 17K    | Light    | 23.35K Lux | Outdoor        |                | chinese_light_static       |
| 26 | Chinese characters | 960    | 735K   | Light    | 23.35K Lux | Outdoor        | ✓              | chinese_light_dynamic      |
| 27 | Piles of garbage   | 54     | 5772K  | Dark     | 4.3 Lux    | Outdoor        |                | piles_dark_static          |
| 28 | Piles of garbage   | 28     | 1291K  | Dark     | 4.3 Lux    | Outdoor        | ✓              | piles_dark_dynamic         |

Table 2. Quantitative comparisons in events of each sequence with the relative error

| Sequence                   | GRAD [10] | WAVS [12] | SFIL [5] | LAP3 [1] | HELM [3] | GLLV [8] | EIGV [11] | DCTM [4] | CHEB [13] | SML [7] | ACMO [9] | ER ( $\Delta t = 0.055$ ) | ER ( $\Delta t = 0.065$ ) | ER + EGS |
|----------------------------|-----------|-----------|----------|----------|----------|----------|-----------|----------|-----------|---------|----------|---------------------------|---------------------------|----------|
| bottle_drone_dark_dynamic  | -2160.0   | -2160.0   | -2160.0  | -2160.0  | 1478.0   | -2160.0  | 1478.0    | -2153.0  | 1478.0    | -2160.0 | 1477.0   | 140.0                     | 127.0                     | 66.0     |
| bottle_drone_dark_static   | -2155.0   | -2155.0   | -2155.0  | -2155.0  | 1490.0   | -2155.0  | -2155.0   | -2158.0  | 1477.0    | -2155.0 | -2159.0  | 77.0                      | 89.0                      | -83.0    |
| bottle_drone_light_dynamic | -2088.0   | -2088.0   | -2088.0  | -2088.0  | 1555.0   | -2088.0  | 1546.0    | -1847.0  | 1555.0    | -2088.0 | -1383.0  | 168.0                     | 118.0                     | -17.0    |
| bottle_drone_light_static  | -2360.0   | -2360.0   | -126.0   | -2360.0  | 1271.0   | -2363.0  | -2362.0   | 400.0    | 1271.0    | -2360.0 | -2363.0  | 109.0                     | 77.0                      | -86.0    |
| cactus_dark_dynamic        | -1644.0   | -1644.0   | -1644.0  | -1644.0  | 1992.0   | -1644.0  | 1936.0    | -1643.0  | 1992.0    | -1644.0 | -1644.0  | 227.0                     | 238.0                     | -236.0   |
| cactus_dark_static         | -1651.0   | -1651.0   | -1651.0  | -1651.0  | 1987.0   | -1651.0  | -1651.0   | -1652.0  | 1987.0    | -1651.0 | -1652.0  | 33.0                      | 25.0                      | -19.0    |
| cactus_light_dynamic       | -1269.0   | -1269.0   | -1269.0  | -1269.0  | 2368.0   | -1268.0  | -1269.0   | -1260.0  | 2368.0    | -1269.0 | 643.0    | 104.0                     | -46.0                     | 45.0     |
| cactus_light_static        | -1459.0   | -1459.0   | -81.0    | -1459.0  | -762.0   | -1459.0  | 2159.0    | 2159.0   | 2159.0    | -1459.0 | -1459.0  | 128.0                     | 163.0                     | -137.0   |
| camel_dark_dynamic         | -2235.0   | -2235.0   | -2235.0  | -2235.0  | 1360.0   | -2235.0  | -2235.0   | 744.0    | 1360.0    | -2235.0 | -2236.0  | -42.0                     | -14.0                     | 39.0     |
| camel_dark_static          | -2135.0   | -2135.0   | -2135.0  | -2135.0  | 1504.0   | -2135.0  | -2124.0   | -2103.0  | 1504.0    | -2135.0 | -2130.0  | 138.0                     | 138.0                     | -155.0   |
| camel_light_dynamic        | -2152.0   | -2152.0   | -2152.0  | -2152.0  | 1489.0   | -2152.0  | 1489.0    | -432.0   | 1488.0    | -2152.0 | 232.0    | 55.0                      | -60.0                     | 52.0     |
| camel_light_static         | -2147.0   | -2147.0   | -71.0    | -2147.0  | 1497.0   | -2148.0  | 1101.0    | -334.0   | 1297.0    | -2148.0 | -2147.0  | 62.0                      | 40.0                      | -12.0    |
| chinese_light_dynamic      | -683.0    | -683.0    | -683.0   | -683.0   | 2957.0   | -683.0   | -683.0    | 126.0    | -683.0    | -683.0  | 95.0     | 79.0                      | 90.0                      | -1.0     |
| chinese_light_static       | -707.0    | -707.0    | -707.0   | -707.0   | 483.0    | -707.0   | 2917.0    | 2917.0   | 2917.0    | -707.0  | -707.0   | 192.0                     | 192.0                     | -191.0   |
| construction_dark_dynamic  | -1250.0   | -1250.0   | -1250.0  | -1250.0  | 2369.0   | -1246.0  | 2366.0    | -755.0   | 2369.0    | -1250.0 | 1980.0   | -125.0                    | 36.0                      | 18.0     |
| construction_dark_static   | -1306.0   | -1306.0   | -1306.0  | -1306.0  | 2336.0   | -1306.0  | 2132.0    | 2334.0   | 2336.0    | -1306.0 | -1306.0  | -99.0                     | -78.0                     | -44.0    |
| construction_light_dynamic | -1437.0   | -1437.0   | -1437.0  | -1437.0  | 2180.0   | -1437.0  | 1066.0    | -1439.0  | 2180.0    | -1437.0 | 980.0    | -177.0                    | 44.0                      | -41.0    |
| construction_light_static  | -1358.0   | -1358.0   | -228.0   | -1358.0  | 2282.0   | -1356.0  | 2282.0    | 42.0     | 2282.0    | -1358.0 | -1358.0  | -4.0                      | -45.0                     | 9.0      |
| crossroad_dark_dynamic     | -1299.0   | -1299.0   | -1287.0  | -1299.0  | 2343.0   | -1289.0  | 2342.0    | 2343.0   | 2342.0    | -1299.0 | 1988.0   | -31.0                     | -21.0                     | 32.0     |
| crossroad_dark_static      | -1274.0   | -1274.0   | -1274.0  | -1274.0  | 2364.0   | -572.0   | 1727.0    | -1275.0  | 1624.0    | -1274.0 | -1275.0  | -29.0                     | 30.0                      | -44.0    |
| crossroad_light_dynamic    | -1602.0   | -1602.0   | -1600.0  | -1602.0  | 2038.0   | -1601.0  | 528.0     | 270.0    | 2038.0    | -1602.0 | 1843.0   | 140.0                     | 7.0                       | -23.0    |
| crossroad_light_static     | -1598.0   | -1598.0   | -1598.0  | -1598.0  | 2040.0   | -1597.0  | -1440.0   | 313.0    | -1597.0   | -1598.0 | 229.0    | -75.0                     | -56.0                     | 50.0     |
| focus_board_dark_dynamic   | -2202.0   | -2202.0   | -2202.0  | -2202.0  | 1437.0   | -2202.0  | -2202.0   | 1437.0   | 1437.0    | -2202.0 | -2201.0  | 12.0                      | 18.0                      | -14.0    |
| focus_board_dark_static    | -2314.0   | -2314.0   | -2314.0  | -2314.0  | 1326.0   | -2314.0  | -2313.0   | -1637.0  | 1326.0    | -2314.0 | -2314.0  | 25.0                      | -7.0                      | 6.0      |
| focus_board_light_dynamic  | -2209.0   | -2208.0   | -2208.0  | -2209.0  | 1425.0   | -2209.0  | 1423.0    | -2174.0  | 1425.0    | -2209.0 | 1343.0   | -14.0                     | 155.0                     | 24.0     |
| focus_board_light_static   | -2250.0   | -2250.0   | -79.0    | -2250.0  | 1377.0   | -2250.0  | 1380.0    | 53.0     | 1377.0    | -2250.0 | -2250.0  | 120.0                     | 67.0                      | -56.0    |
| piles_dark_dynamic         | -1269.0   | -1269.0   | -1269.0  | -1269.0  | 2323.0   | -1269.0  | 2323.0    | -596.0   | 2323.0    | -1269.0 | -1275.0  | 35.0                      | 16.0                      | 49.0     |
| piles_dark_static          | -1242.0   | -1242.0   | -1242.0  | -1242.0  | 2390.0   | -1242.0  | -1242.0   | -268.0   | 2390.0    | -1242.0 | -1246.0  | 14.0                      | 39.0                      | -28.0    |

Table 3. Cross-comparisons in events and frames of each sequence with the relative error

| Sequence                   | GRAD [10] | WAVS [12] | SFIL [5] | LAP3 [1] | HELM [3] | GLLV [8] | EIGV [11] | DCTM [4] | CHEB [13] | SML [7] | ACMO [9] | ER ( $\Delta t = 0.055$ ) | ER ( $\Delta t = 0.065$ ) | ER + EGS |
|----------------------------|-----------|-----------|----------|----------|----------|----------|-----------|----------|-----------|---------|----------|---------------------------|---------------------------|----------|
| bottle_drone_dark_dynamic  | 257.0     | -2160.0   | -2159.0  | -2160.0  | 1476.0   | 257.0    | 1476.0    | -2161.0  | -2155.0   | -2161.0 | -1207.0  | 140.0                     | 127.0                     | 66.0     |
| bottle_drone_dark_static   | 141.0     | 141.0     | 141.0    | 141.0    | 141.0    | 141.0    | 1017.0    | -2159.0  | -1578.0   | 141.0   | -2155.0  | 77.0                      | 89.0                      | -83.0    |
| bottle_drone_light_dynamic | 95.0      | 95.0      | 321.0    | 95.0     | 162.0    | 95.0     | 1554.0    | -163.0   | -2089.0   | 95.0    | -2083.0  | 168.0                     | 118.0                     | -17.0    |
| bottle_drone_light_static  | 25.0      | 25.0      | 25.0     | 25.0     | -5.0     | 25.0     | -770.0    | 234.0    | -91.0     | 25.0    | -2363.0  | 109.0                     | 77.0                      | -86.0    |
| cactus_dark_dynamic        | -113.0    | 1991.0    | -113.0   | 1992.0   | 1992.0   | -113.0   | -113.0    | -1580.0  | -1580.0   | -1580.0 | -1581.0  | 227.0                     | 238.0                     | -236.0   |
| cactus_dark_static         | 17.0      | 1985.0    | 17.0     | 17.0     | 17.0     | 17.0     | 17.0      | 373.0    | 17.0      | -1651.0 | -1651.0  | 33.0                      | 25.0                      | -19.0    |
| cactus_light_dynamic       | -5.0      | -5.0      | -5.0     | -5.0     | -5.0     | 17.0     | -5.0      | -1268.0  | -5.0      | -5.0    | 1304.0   | 104.0                     | -46.0                     | 45.0     |
| cactus_light_static        | -35.0     | -55.0     | -14.0    | -55.0    | -14.0    | -14.0    | -14.0     | -383.0   | -14.0     | -55.0   | -1458.0  | 128.0                     | 163.0                     | -137.0   |
| camel_dark_dynamic         | -2235.0   | -2235.0   | 178.0    | -2235.0  | 178.0    | -2235.0  | -2235.0   | 1360.0   | 1360.0    | -2235.0 | -2235.0  | -42.0                     | -14.0                     | 39.0     |
| camel_dark_static          | 146.0     | 146.0     | 146.0    | 146.0    | 146.0    | 146.0    | 708.0     | -1022.0  | 146.0     | 146.0   | -2135.0  | 138.0                     | 138.0                     | -155.0   |
| camel_light_dynamic        | -7.0      | -7.0      | -7.0     | -7.0     | -7.0     | -7.0     | -498.0    | -192.0   | -7.0      | -7.0    | -2056.0  | 55.0                      | -60.0                     | 52.0     |
| camel_light_static         | -4.0      | -4.0      | -4.0     | -4.0     | -4.0     | -4.0     | -79.0     | -427.0   | -4.0      | -4.0    | -2148.0  | 62.0                      | 40.0                      | -12.0    |
| chinese_light_dynamic      | -24.0     | -47.0     | 43.0     | -24.0    | -24.0    | -24.0    | 43.0      | 117.0    | -24.0     | -24.0   | 98.0     | 79.0                      | 90.0                      | -1.0     |
| chinese_light_static       | -46.0     | -68.0     | 11.0     | -68.0    | -33.0    | -9.0     | -33.0     | 348.0    | -9.0      | -68.0   | -462.0   | 192.0                     | 192.0                     | -191.0   |
| construction_dark_dynamic  | 99.0      | 99.0      | -1249.0  | 99.0     | 99.0     | -1244.0  | -1248.0   | 1257.0   | -1250.0   | 99.0    | -1248.0  | -125.0                    | 36.0                      | 18.0     |
| construction_dark_static   | 118.0     | 118.0     | 118.0    | 118.0    | 118.0    | 118.0    | -1305.0   | 2336.0   | 118.0     | 118.0   | -1306.0  | -99.0                     | -78.0                     | -44.0    |
| construction_light_dynamic | -112.0    | -165.0    | -74.0    | -165.0   | -53.0    | -11.0    | 1720.0    | -1438.0  | -132.0    | -152.0  | -1439.0  | -177.0                    | 44.0                      | -41.0    |
| construction_light_static  | -20.0     | -74.0     | 40.0     | -57.0    | 40.0     | 79.0     | 1014.0    | -1343.0  | 17.0      | -74.0   | -1356.0  | -4.0                      | -45.0                     | 9.0      |
| crossroad_dark_dynamic     | 132.0     | 132.0     | 365.0    | 132.0    | 132.0    | -95.0    | -1300.0   | 2342.0   | 2342.0    | 132.0   | 2342.0   | -31.0                     | -21.0                     | 32.0     |
| crossroad_dark_static      | 84.0      | 84.0      | 84.0     | 84.0     | 84.0     | 558.0    | 2365.0    | -1276.0  | -1273.0   | 84.0    | 2364.0   | -29.0                     | 30.0                      | -44.0    |
| crossroad_light_dynamic    | 47.0      | -51.0     | 172.0    | -51.0    | -9.0     | 94.0     | 717.0     | 358.0    | 67.0      | -51.0   | -1602.0  | 140.0                     | 7.0                       | -23.0    |
| crossroad_light_static     | 87.0      | 11.0      | 156.0    | 11.0     | 102.0    | 156.0    | 671.0     | 156.0    | 87.0      | 11.0    | -1598.0  | -75.0                     | -56.0                     | 50.0     |
| focus_board_dark_dynamic   | 23.0      | -567.0    | 23.0     | -567.0   | 1437.0   | 23.0     | 1437.0    | 1437.0   | 23.0      | -2180.0 | -2200.0  | 12.0                      | 18.0                      | -14.0    |
| focus_board_dark_static    | -2.0      | -2.0      | -2.0     | -2.0     | -2.0     | -2.0     | -2.0      | 1327.0   | -2.0      | -2.0    | -2310.0  | 25.0                      | -7.0                      | 6.0      |
| focus_board_light_dynamic  | 109.0     | 24.0      | 109.0    | 24.0     | -70.0    | 24.0     | -70.0     | 622.0    | 109.0     | 24.0    | 1098.0   | -14.0                     | 155.0                     | 24.0     |
| focus_board_light_static   | -71.0     | -71.0     | -39.0    | -71.0    | -71.0    | -39.0    | -2252.0   | -134.0   | -39.0     | -71.0   | -637.0   | 120.0                     | 67.0                      | -56.0    |
| piles_dark_dynamic         | -91.0     | 241.0     | -1273.0  | 241.0    | -91.0    | -1273.0  | -1274.0   | -1274.0  | -1269.0   | -1273.0 | -1274.0  | 35.0                      | 16.0                      | 49.0     |
| piles_dark_static          | 360.0     | 360.0     | 360.0    | 360.0    | 360.0    | 360.0    | -1245.0   | 13.0     | 360.0     | -1245.0 | -1245.0  | 14.0                      | 39.0                      | -28.0    |

## 1. Appendix

In the appendix, we show that why the intensity gradient can effectively capture the high-frequency information of intensity to reflect the degree of defocus.

### 1.1. Analysis of Defocusing and Focusing

The lens system can be conceptually modeled by the *thick lens* model, which follows the *Gaussian lens law*:

$$\frac{1}{d_o} + \frac{1}{d_i} = \frac{1}{f},$$

where  $d_o$  is the object distance,  $d_i$  is the image distance,  $f$  is the focal length. When the distance from the lens to sensor plane  $d_s$  equals image distance  $d_i$ , the sensor is properly focused, defocused otherwise. Let  $\epsilon = |d_s - d_i|$  be the distance error, the change of object distance  $d_o$  changes  $d_i$ , thereby increasing the error  $\epsilon$  and causing defocusing. The motorized varifocal lens can move the lens to reduce the distance error  $\epsilon$  to refocus the system.

The relationship between the defocused intensity  $I_d(x, y)$  and focused intensity  $I_f(x, y)$  can be modelled using a 2-D Gaussian convolution [6]:

$$I_d(x, y) = h(x, y) * I_f(x, y), \quad (1)$$

where

$$h(x, y) = \frac{1}{2\pi\sigma_h^2} e^{-\frac{x^2+y^2}{2\sigma_h^2}}, \quad (2)$$

$h(x, y)$  is the Gaussian convolution kernel of defocusing, the  $\sigma_h$  is the spread parameter and is proportional to the distance error of focusing  $\epsilon$ . In the frequency domain, we have:

$$I_D(u, v) = H(u, v) \cdot I_F(u, v), \quad (3)$$

where  $I_D(u, v)$ ,  $H(u, v)$  and  $I_F(u, v)$  are the Fourier transforms of  $I_d(x, y)$ ,  $h(x, y)$  and  $I_f(x, y)$  respectively, and  $H(u, v)$  could be given by:

$$H(u, v) = e^{-\frac{u^2+v^2}{2}\sigma_h^2}. \quad (4)$$

When the degree of out-of-focus increases, the distance error  $\epsilon$  increases, causing the increase of  $\sigma_h$  in Eq. (4), that is to say, the more defocus, the more the lens attenuates the high-frequency part of the focused intensity and blur the focused data. To automatically adjust the focal position of the lens, we need to measure the degree of defocus from data captured by cameras at different focal positions. This could be done by using the Sobel operator.

The Sobel operator is the approximation of the derivative of Gaussian filter [2], processing the defocused intensity with the Sobel operator is to convolve the defocused intensity with the derivatives of the Gaussian filter:

$$I_{sx}(x, y) = I_d(x, y) * \frac{dg(x, y)}{dx}, \quad (5)$$

$$I_{sy}(x, y) = I_d(x, y) * \frac{dg(x, y)}{dy}, \quad (6)$$

$g(x, y)$  is the inherent Gaussian filter of the Sobel operator. which can be given by:

$$g(x, y) = \frac{1}{2\pi\sigma_g^2} e^{-\frac{x^2+y^2}{2\sigma_g^2}} \quad (7)$$

In the frequency domain, Eq. (7) is:

$$G(u, v) = e^{-\frac{u^2+v^2}{2}\sigma_g^2}, \quad (8)$$

and Eq. (5) and Eq. (6) are:

$$\begin{aligned} I_{Sx}(u, v) &= I_D(u, v) \cdot (iu) \cdot G(u, v), \\ &= I_D(u, v) \cdot (iu) \cdot e^{-\frac{u^2+v^2}{2}\sigma_g^2}, \end{aligned} \quad (9)$$

$$\begin{aligned} I_{Sy}(u, v) &= I_D(u, v) \cdot (jv) \cdot G(u, v), \\ &= I_D(u, v) \cdot (jv) \cdot e^{-\frac{u^2+v^2}{2}\sigma_g^2}, \end{aligned} \quad (10)$$

where  $i$ , and  $j$  are imaginary units,  $I_{Sx}(u, v)$ ,  $I_{Sy}(u, v)$ , and  $G(u, v)$  are Fourier transforms of  $I_{sx}(x, y)$ ,  $I_{sy}(x, y)$ , and  $g(x, y)$  respectively. The intensity after convolutions with Sobel operators  $I_s(x, y)$  is:

$$I_s(x, y) = \sqrt{I_{sx}^2(x, y) + I_{sy}^2(x, y)}. \quad (11)$$

According to the discrete form of Parseval's theorem, the energy relationship of the intensity in spatial domains  $I(x, y)$  and frequency domains  $I(u, v)$  is:

$$\sum_{x=0}^W \sum_{y=0}^H |I(x, y)|^2 = \frac{1}{WH} \sum_u \sum_v |I(u, v)|^2, \quad (12)$$

where  $W$  and  $H$  are the width and height of the sensor plane, respectively. Applying Eq. (12) to  $I_{sx}(x, y)$  and  $I_{sy}(x, y)$ , and sums them up, we have:

$$\sum_{x=0}^W \sum_{y=0}^H |I_{sx}(x, y)|^2 + |I_{sy}(x, y)|^2 = \frac{1}{WH} \sum_u \sum_v |I_{Sx}(u, v)|^2 + |I_{Sy}(u, v)|^2. \quad (13)$$

Applying Eq. (11) to the left of Eq. (13), then relating Eq. (9), and Eq. (10) to the right of Eq. (13), we have:

$$\sum_{x=0}^W \sum_{y=0}^H |I_s(x, y)|^2 = \frac{1}{WH} \sum_u \sum_v (u^2 + v^2) \cdot e^{-(u^2+v^2)\sigma_g^2} \cdot |I_D(u, v)|^2. \quad (14)$$

Finally, by putting Eq. (3) in Eq. (14), we have the energy relationship of intensity gradient in spatial and frequency domains:

$$\sum_{x=0}^W \sum_{y=0}^H |I_s(x, y)|^2 = \frac{1}{WH} \sum_u \sum_v (u^2 + v^2) \cdot e^{-(u^2+v^2)(\sigma_h^2+\sigma_g^2)} \cdot |I_F(u, v)|^2. \quad (15)$$

In Eq. (15), there are two important terms. The first term is  $u^2 + v^2$ , a second-order parabola in the frequency domain and stays unchanged. The second terms is  $e^{-(u^2+v^2)(\sigma_h^2+\sigma_g^2)}$ . In the second term,  $\sigma_h$  is introduced by defocus, which changes following the degree of defocus,  $\sigma_g$  is introduced by the Sobel operator and stays unchanged. So we can see that the first term is the differential term that removes the DC component in the intensity, changes the band frequency component, and does not change with the  $\sigma_h$ . In the second term, all band frequency components decrease monotonously with the increase of  $\sigma_h$ . Therefore, the energy of the gradient decreases monotonically with the increase of  $\sigma_h$ . In the spatial domain, the gradient of the intensity, *i.e.*,  $I_s(x, y)$  decreases monotonically with the increase of  $\sigma_h$ . As  $\sigma_h$  is linearly proportional to the distance error of focusing  $\epsilon$ , we successfully established the relationship between the intensity gradient and the  $\epsilon$ . This relationship shows that the intensity gradient computed using the Sobel operator can properly reflect the degree of defocus.

## 1.2. Complexity Analysis

The complexity of focus measure ER is  $\mathcal{O}(N_e)$  as it is a simple event counting operator. Regarding EGS, we only have to calculate ER once and then implement the Goden section search algorithm, which is efficient and only has complexity of  $\mathcal{O}(N_e)$ . The runtime curves of ER (Fig. 2b) and EGS (Fig. 2a) verify the linear complexity of our methods. Noted that EGS is very efficient (<10 ms for 3 million events).



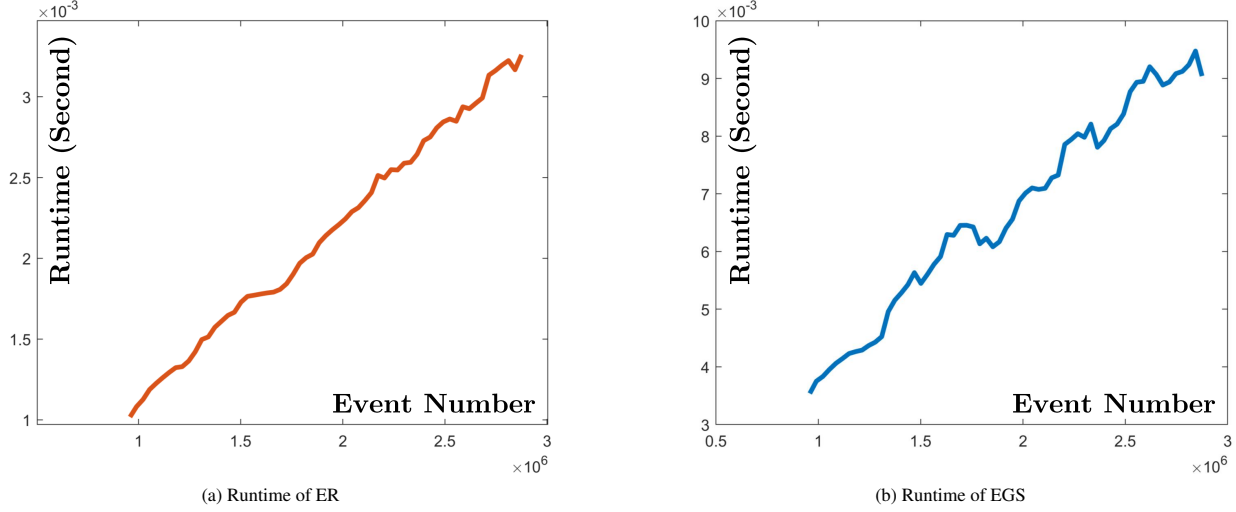

Figure 2. Runtime of ER and EGS computed using the sequence: *focus.board.dark.dynamic*. We randomly sample events in this sequence to generate a subset and measure the computing time of our algorithms in this subset. As we gradually increase the size of the subset, we can see that the runtime of our algorithm is linear to the event number.

### 1.3. Failure Cases Analysis

In the main content of the paper, we provide the averaged mean square error and root mean square error for general results. In this appendix, we provide the full results of all sequences using the relative error, which is more effective in demonstrating whether or not our algorithm has near/far bias. The quantitative comparisons in events with the relative error of each sequence are shown in Tab. 2 and cross-comparisons in events and frames are shown in Tab. 3. In Tab. 2, we can see that due to the event noise, previous methods cannot properly operate on the event frame, resulting in large errors.

From Tab. 3, we can see that our ER+EGS gains relatively large error in *camel.dark.static* (-155), *chinese.light.static* (-191), and *cactus.light.static* (-137.0). The reason is a combination of noise and the simplicity of the scenes. In simple scenes, contrast variations are low, generating fewer events. Due to a relatively low signal-noise ratio, the real ER peak value can hardly distinguish itself from surrounding measurements. Our EGS starts with large intervals contaminated by noise, and as the peak is not sharp enough, noise creates several suboptimal results, making EGS ultimately converges to one of them.

For the dynamic case *cactus.dark.dynamic* (-236.0), the shaking motion is too large, breaking the assumption that the field of view should be constrained to the consistent targets during focusing, leading to other optimal points being focused. Most frame-based methods work well in images captured under static scenes with comfort lighting conditions. But in dynamic scenes with poor lighting conditions, these frame-based methods fail heavily (e.g., 257 vs. 66 in *bottle.drone.dark.dynamic*).

### References

- [1] Youngeun An, Gwangwon Kang, Il-Jung Kim, Hyun-Sook Chung, and Jongan Park. Shape from focus through laplacian using 3d window. In *2008 Second International Conference on Future Generation Communication and Networking*, volume 2, pages 46–50, 2008. 3, 4
- [2] Rafael C Gonzalez and Richard E Woods. *Digital image processing*, hoboken, 2018. 5
- [3] Franz Stephan Helmli and Stefan Scherer. Adaptive shape from focus with an error estimation in light microscopy. In *Proceedings of the 2nd International Symposium on Image and Signal Processing and Analysis*, pages 188–193, 2001. 3, 4
- [4] Sang-Yong Lee, Yogendera Kumar, Ji-Man Cho, Sang-Won Lee, and Soo-Won Kim. Enhanced autofocus algorithm using robust focus measure and fuzzy reasoning. *IEEE Transactions on Circuits and Systems for Video Technology*, 18(9):1237–1246, 2008. 3, 4
- [5] Rashid Minhas, Abdul A Mohammed, QM Jonathan Wu, and Maher A Sid-Ahmed. 3d shape from focus and depth map computation using steerable filters. In *International conference image analysis and recognition*, pages 573–583. Springer, 2009. 3, 4
- [6] Shree K Nayar and Yasuo Nakagawa. Shape from focus: An effective approach for rough surfaces. In *Proceedings., IEEE International Conference on Robotics and Automation (ICRA)*, pages 218–225, 1990. 5
- [7] Shree K Nayar and Yasuo Nakagawa. Shape from focus. *IEEE Transactions on Pattern analysis and machine intelligence*, 16(8):824–831, 1994. 3, 4

- [8] José Luis Pech-Pacheco, Gabriel Cristóbal, Jesús Chamorro-Martínez, and Joaquín Fernández-Valdivia. Diatom autofocus in brightfield microscopy: a comparative study. In *Proceedings 15th International Conference on Pattern Recognition (ICPR)*, volume 3, pages 314–317, 2000. 3, 4
- [9] Mukul V Shirvaikar. An optimal measure for camera focus and exposure. In *Thirty-Sixth Southeastern Symposium on System Theory, 2004. Proceedings of the*, pages 472–475, 2004. 3, 4
- [10] Jay Martin Tenenbaum. *Accommodation in computer vision*. Stanford University, 1971. 3, 4
- [11] Chong-Yaw Wee and Raveendran Paramesran. Measure of image sharpness using eigenvalues. *Information Sciences*, 177(12):2533–2552, 2007. 3, 4
- [12] Ge Yang and Bradley J Nelson. Wavelet-based autofocus and unsupervised segmentation of microscopic images. In *Proceedings of IEEE/RSJ International Conference on Intelligent Robots and Systems (IROS)*, volume 3, pages 2143–2148, 2003. 3, 4
- [13] Pew Thian Yap and P Raveendran. Image focus measure based on chebyshev moments. *IEE Proceedings-Vision, Image and Signal Processing*, 151(2):128–136, 2004. 3, 4
