# Supplementary material
Source: ML conference proceedings conference paper supplement (https://openaccess.thecvf.com/content/CVPR2022/html/Lin_Autofocus_for_Event_CVPR_2022_paper.html)
Supplement: Supplementary file 2 [file Lin_Autofocus_for_Event_CVPR_2022_supplemental.zip]

Archive with 2 entries (2 files):
- appendix.pdf
- Video.m4v
